# Supplementary material for: Multimodal HLA-I genotype regulation by human cytomegalovirus US10 and resulting surface patterning
Source: eLife journal article supplement (doi:10.7554/elife.85560), 2024-05-15
Supplement: fig3-figsupp1-data1 [file elife-85560-fig3-figsupp1-data1-v1.zip]

IP: anti-Tapasin

IP: anti-Erp57

Tapasin<sup>-/-</sup>

Tapasin<sup>-/-</sup>

WT

31-I

102-I

WT

31-I

102-I

short  
exposure

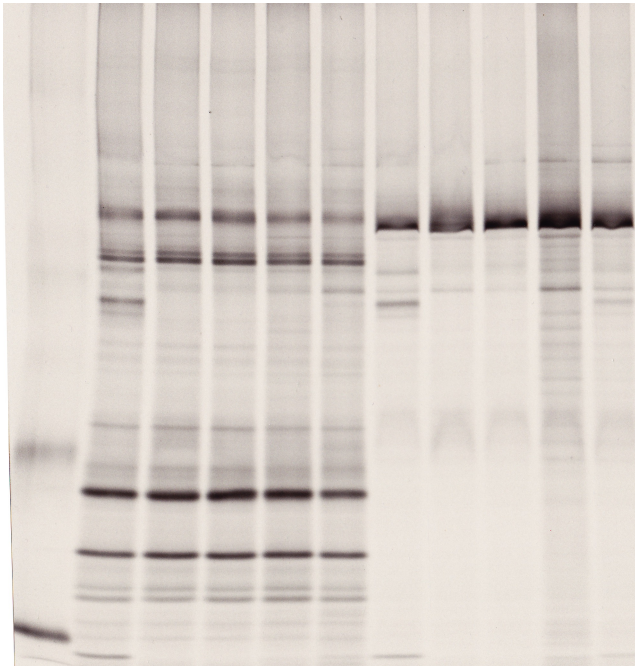

— ERp57  
— Tapasin  
= HLA-I HC

long  
exposure

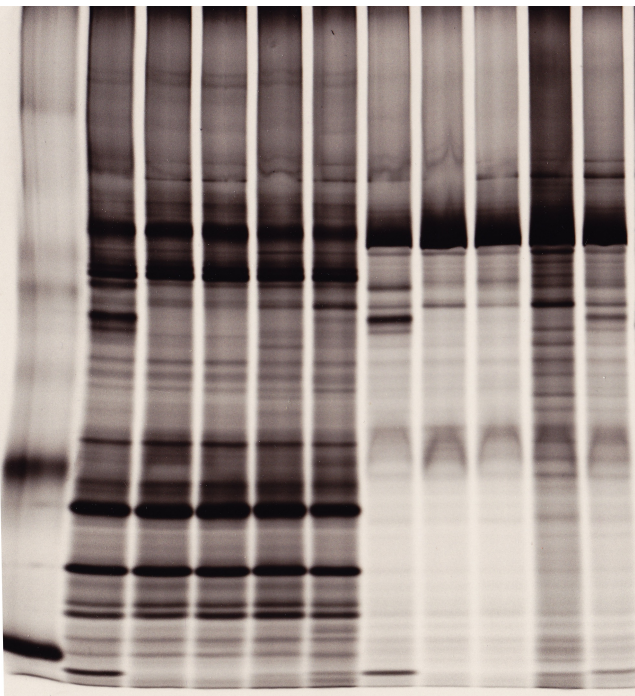

— ERp57  
— Tapasin  
= HLA-I HC
