# Supplementary figures and images for: Multimodal HLA-I genotype regulation by human cytomegalovirus US10 and resulting surface patterning
Source: eLife journal article supplement (doi:10.7554/elife.85560), 2024-05-15

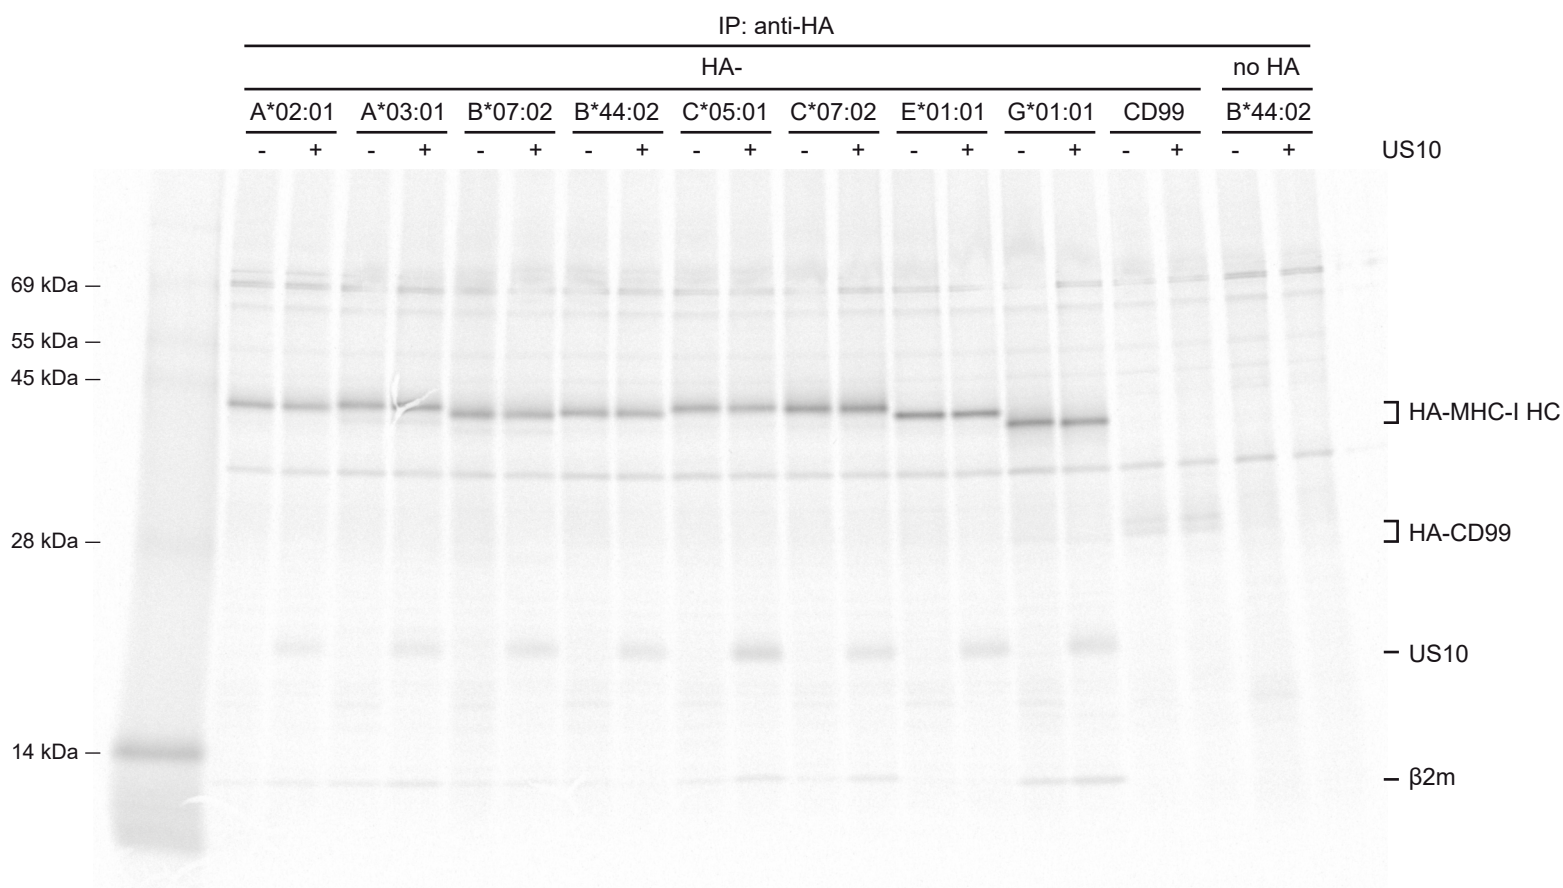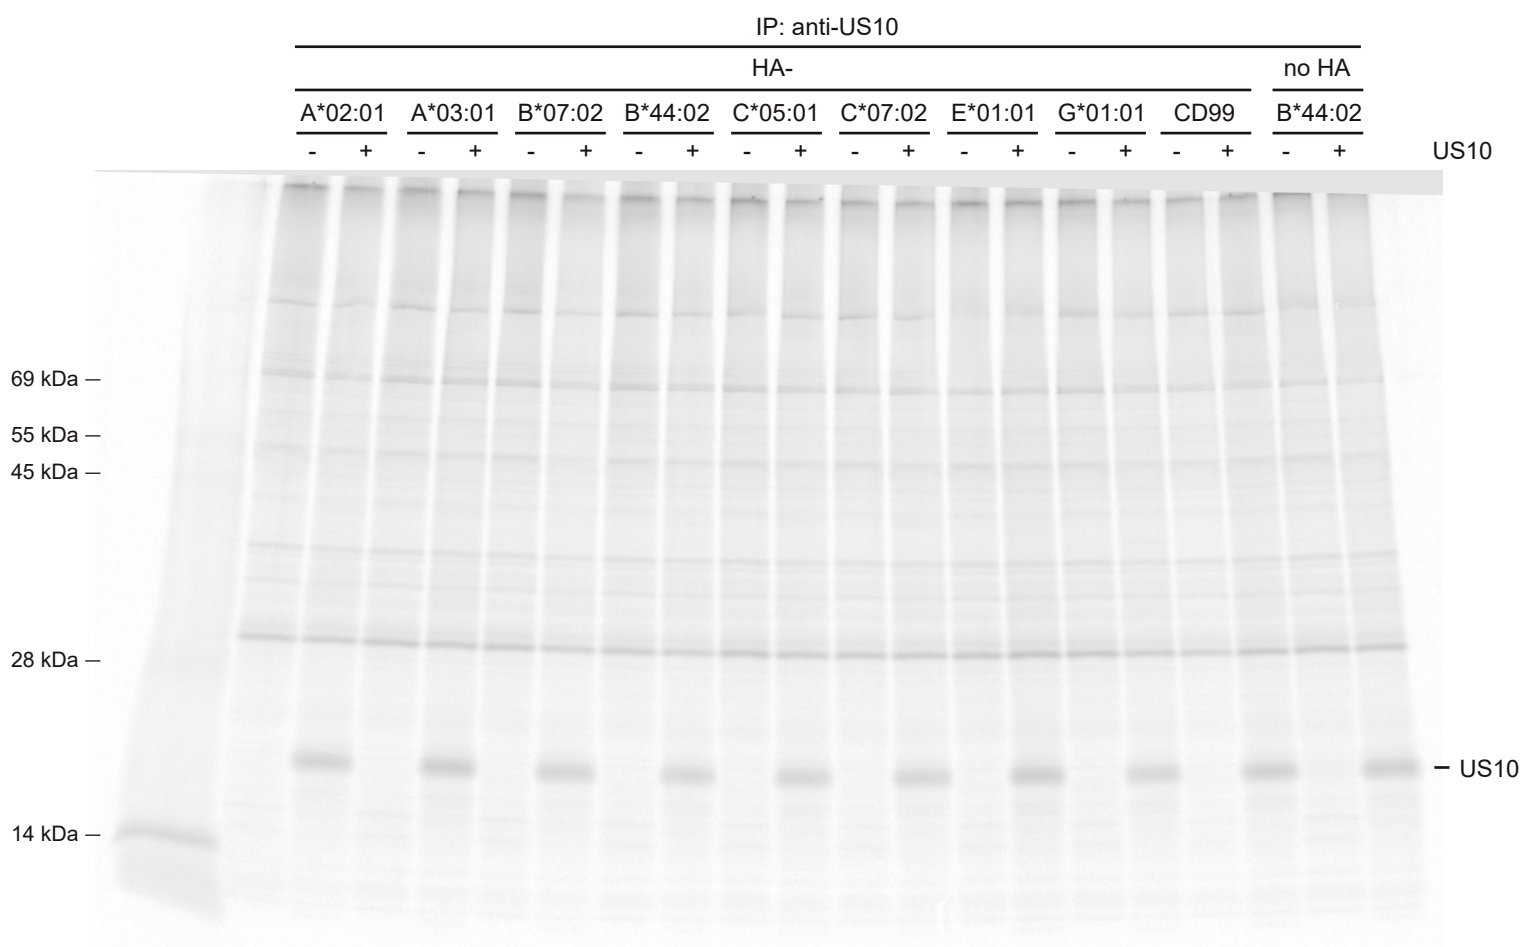

**Figure 1C: uncropped gels**

Supplement: fig1-data1 [file elife-85560-fig1-data1-v1.zip]

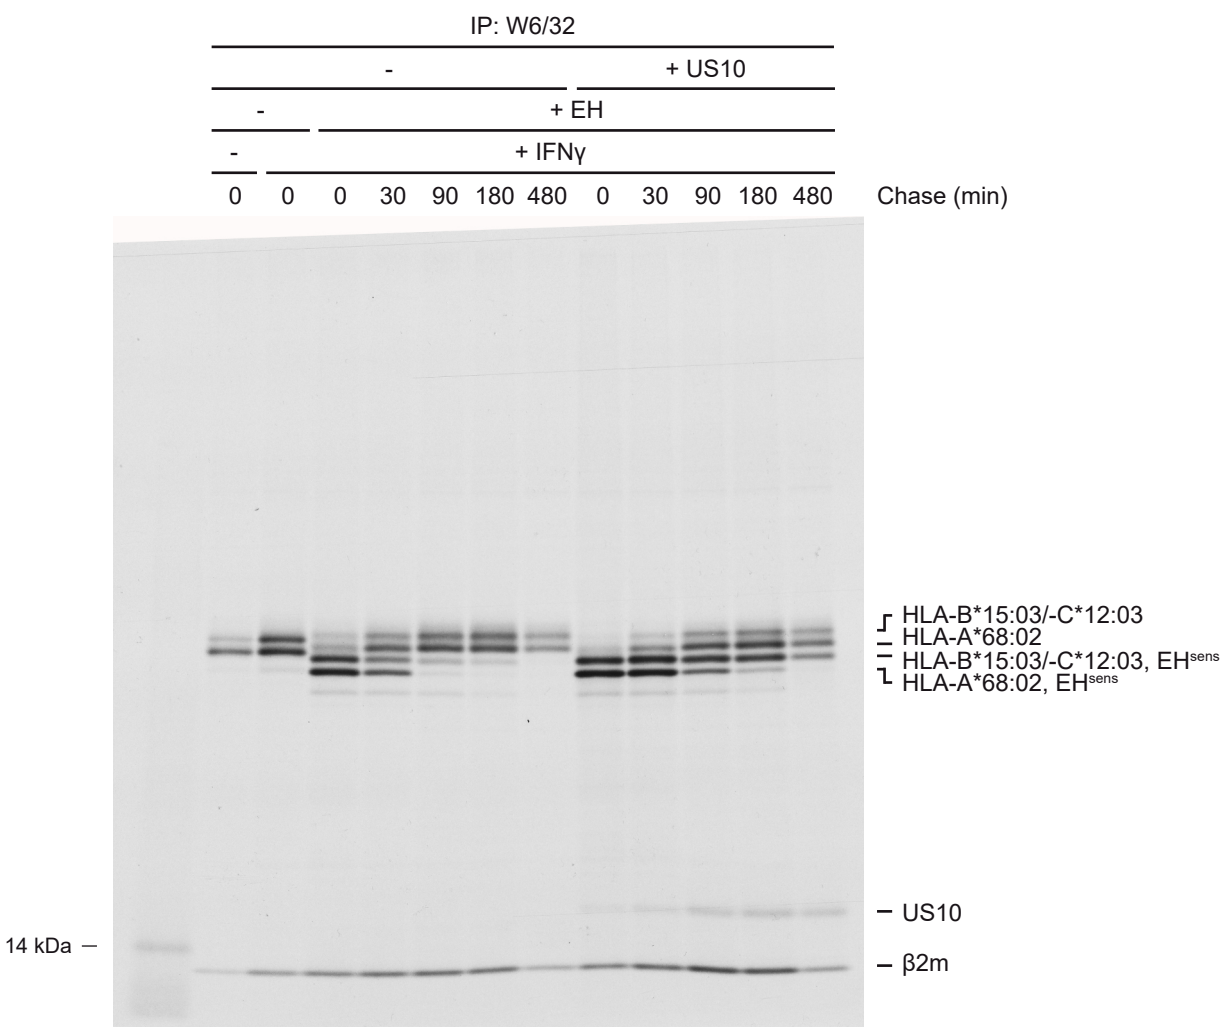

Figure 2A: uncropped gel

Supplement: fig2-data1 [file elife-85560-fig2-data1-v1.zip]

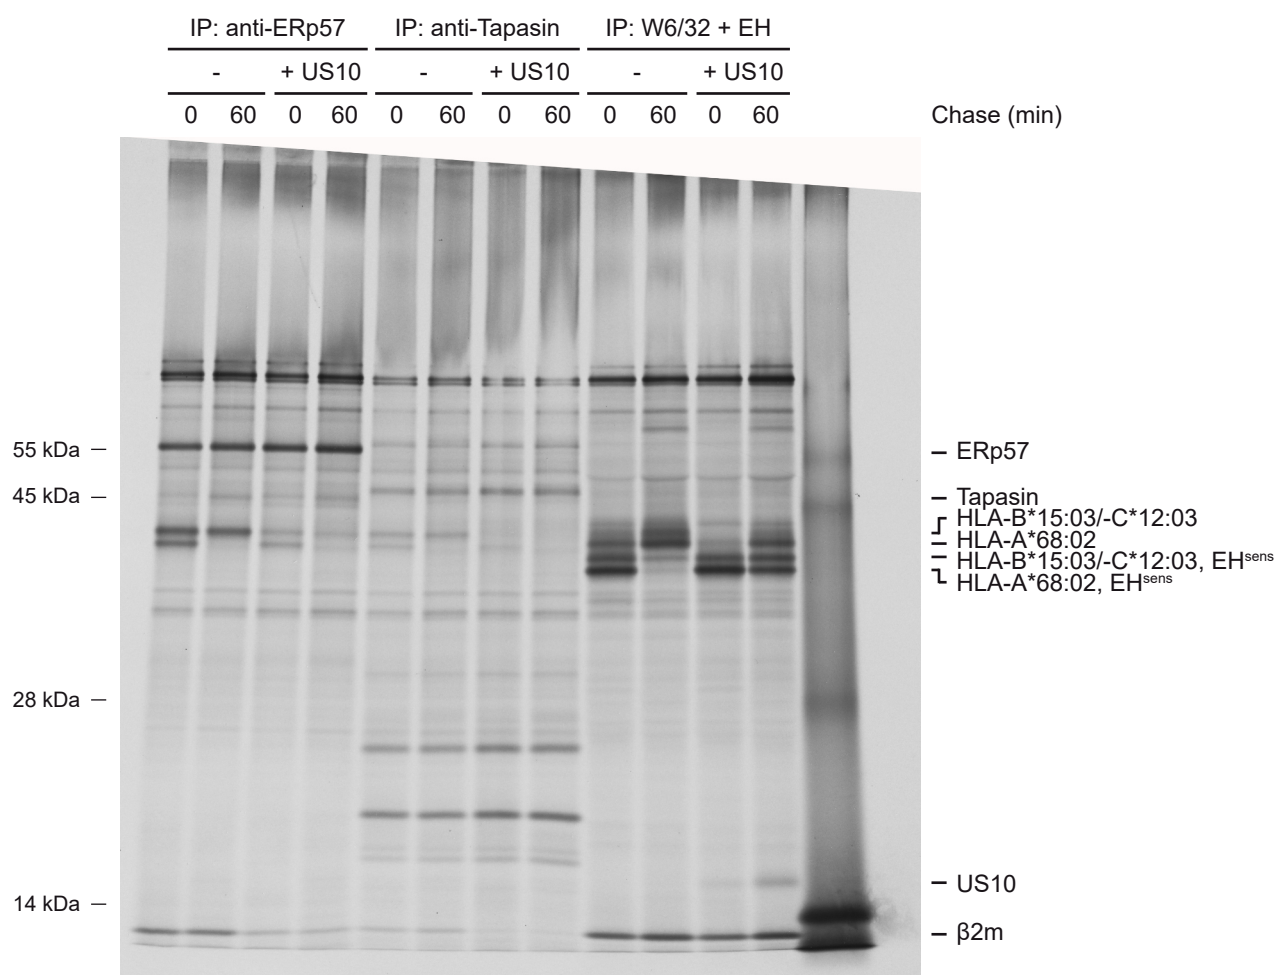

**Figure 2C: uncropped gel**

Supplement: fig2-data2 [file elife-85560-fig2-data2-v1.zip]

IP: anti-ERp57

IP: anti-US10

|   |   |   |   |
|---|---|---|---|
| - | + | + | + |
| + | + | + | - |
| - | - | + | + |

|   |   |   |   |         |
|---|---|---|---|---------|
| - | + | + | + | US10    |
| + | + | + | - | HLA-I   |
| - | - | + | + | Tapasin |

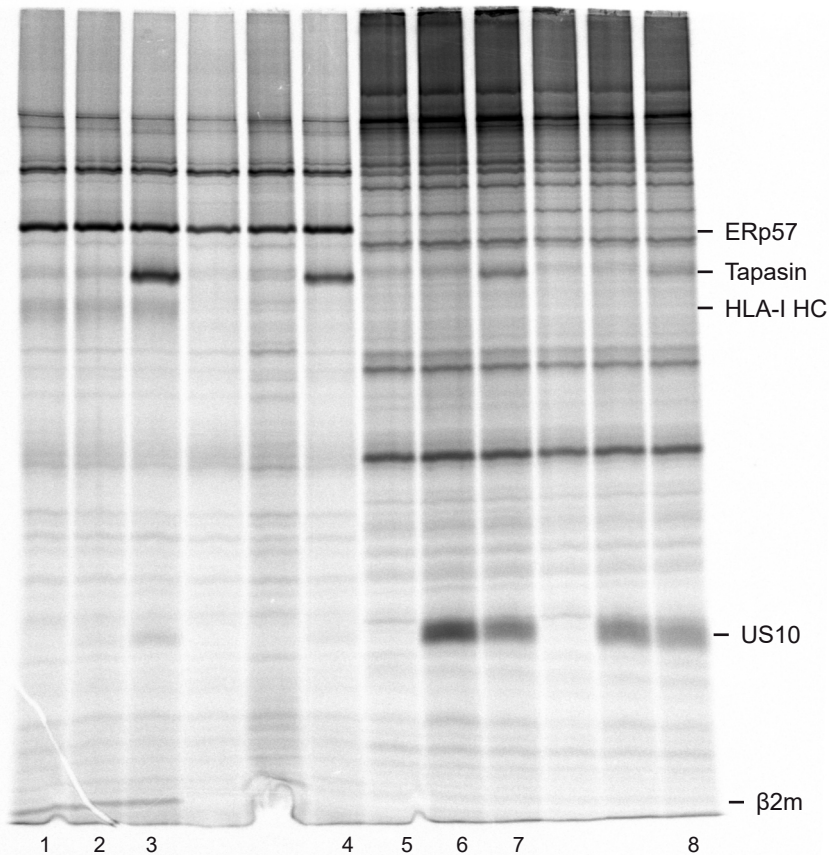

Supplement: fig2-data3 [file elife-85560-fig2-data3-v1.zip]

IP:  
W6/32

WT  
HLA-I KO

HLA-I HC

—  $\beta$ 2m

55 kDa —

45 kDa —

28 kDa —

14 kDa —

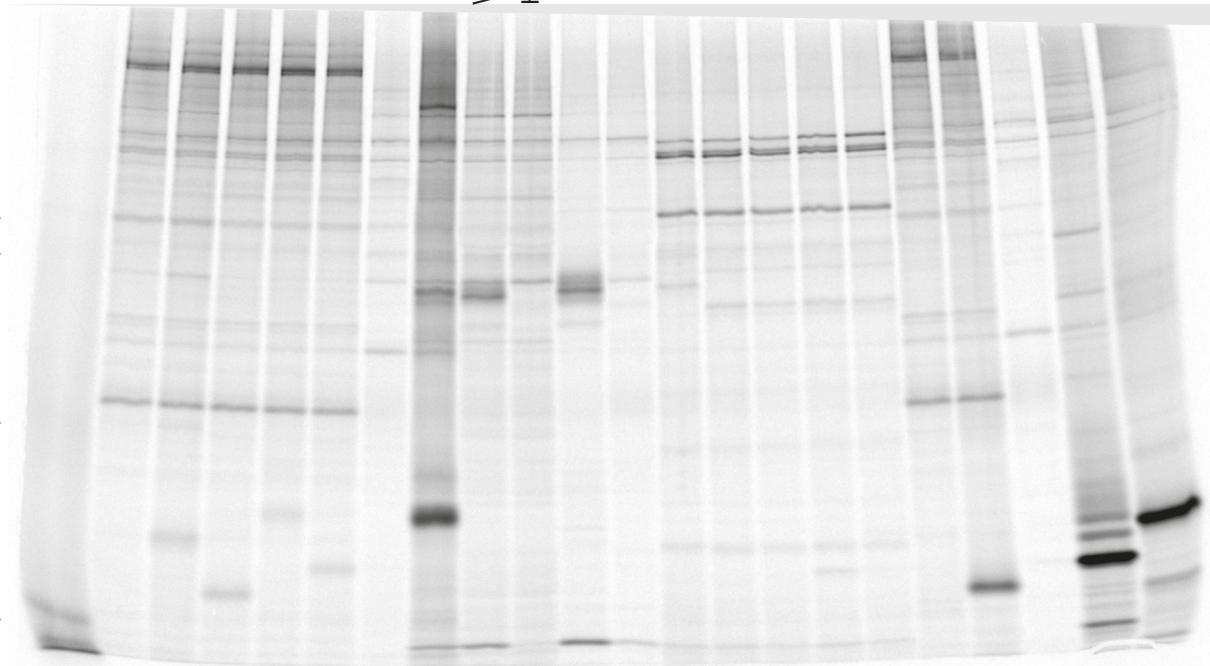

Supplement: fig2-figsupp1-data1 [file elife-85560-fig2-figsupp1-data1-v1.zip]

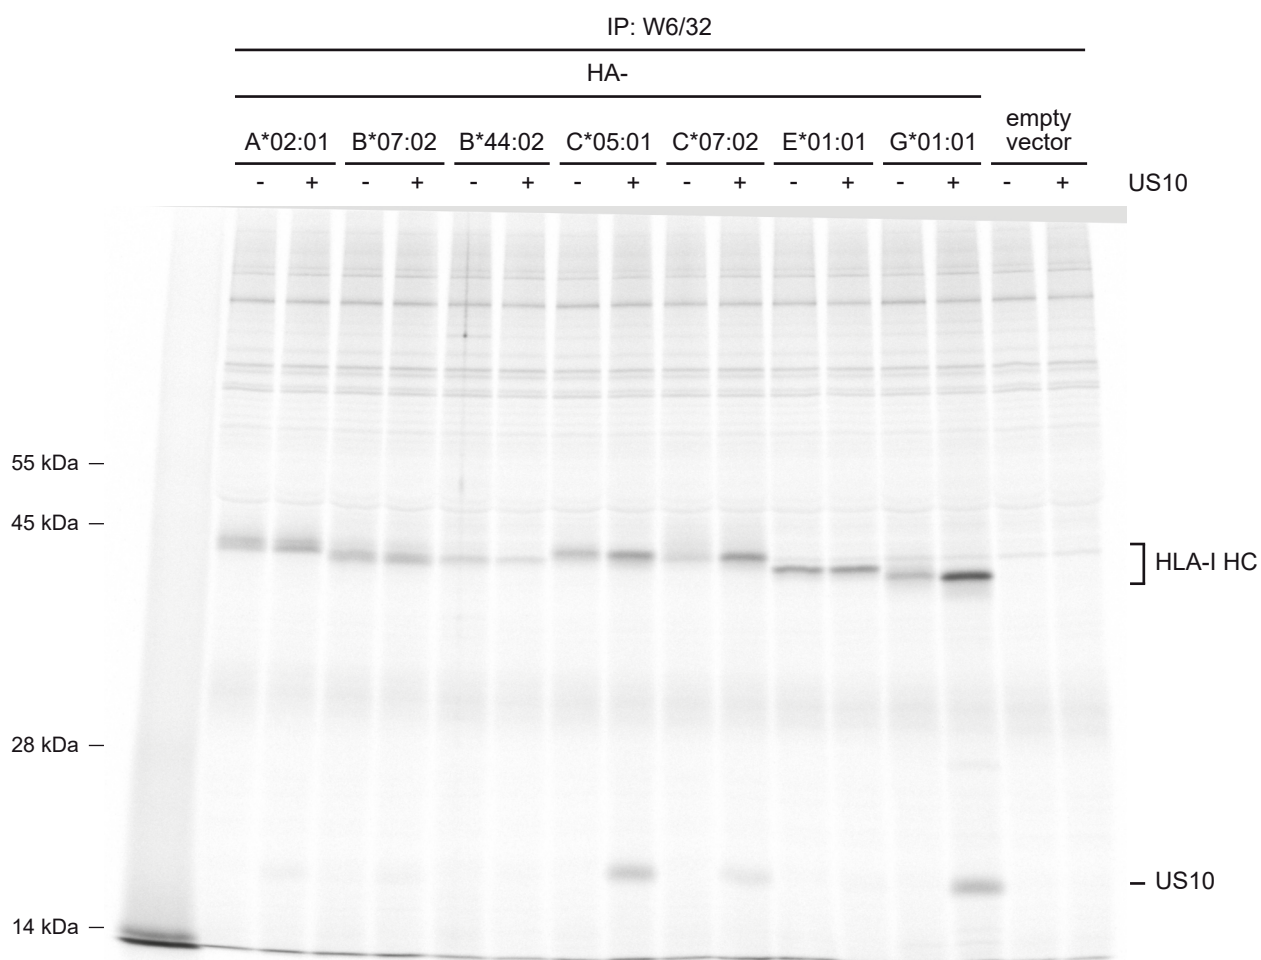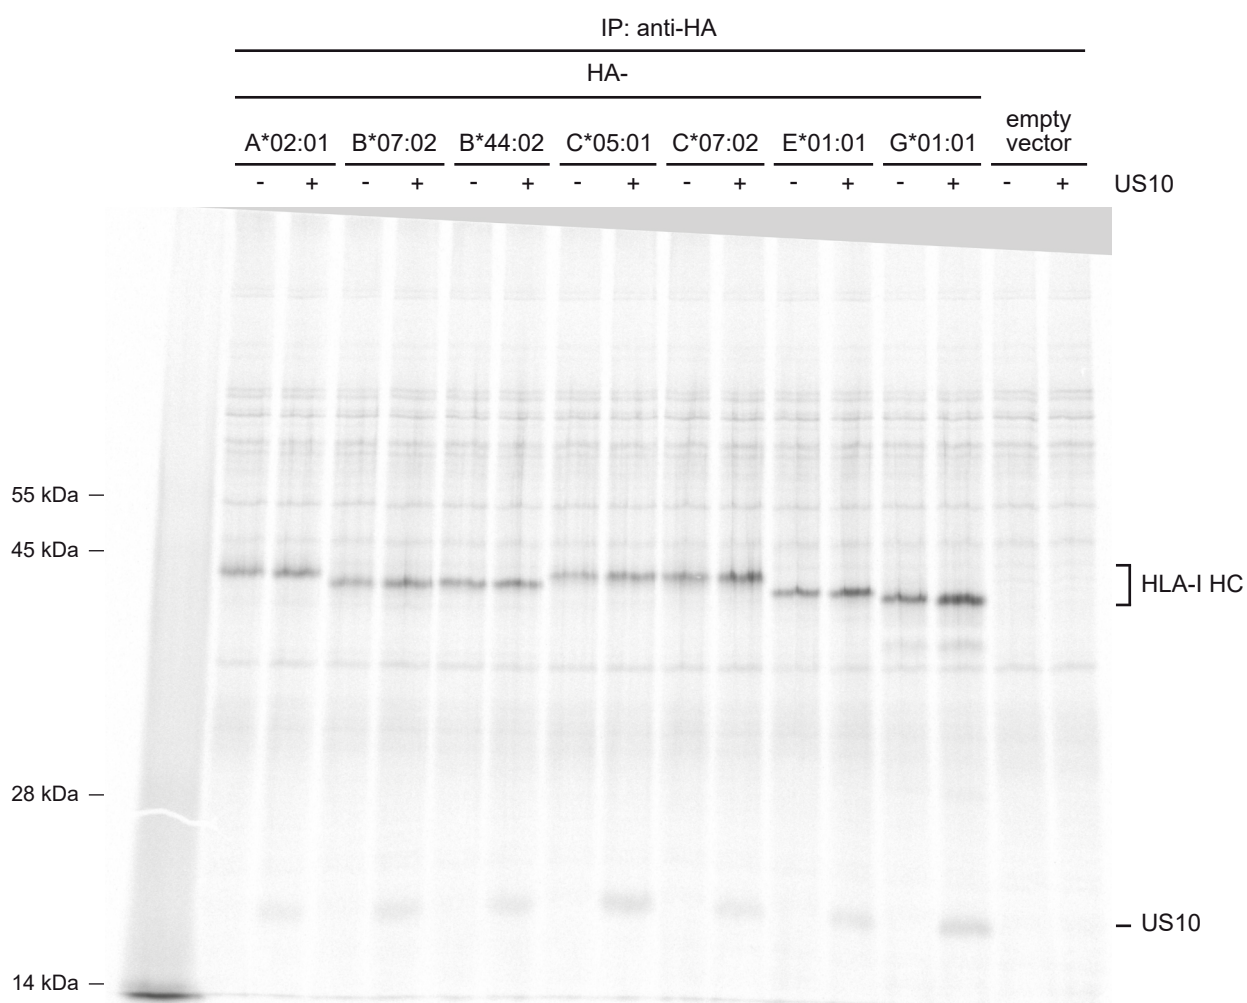

Figure 4A: uncropped gels (1)

Supplement: fig4-data1 [file elife-85560-fig4-data1-v1.zip]

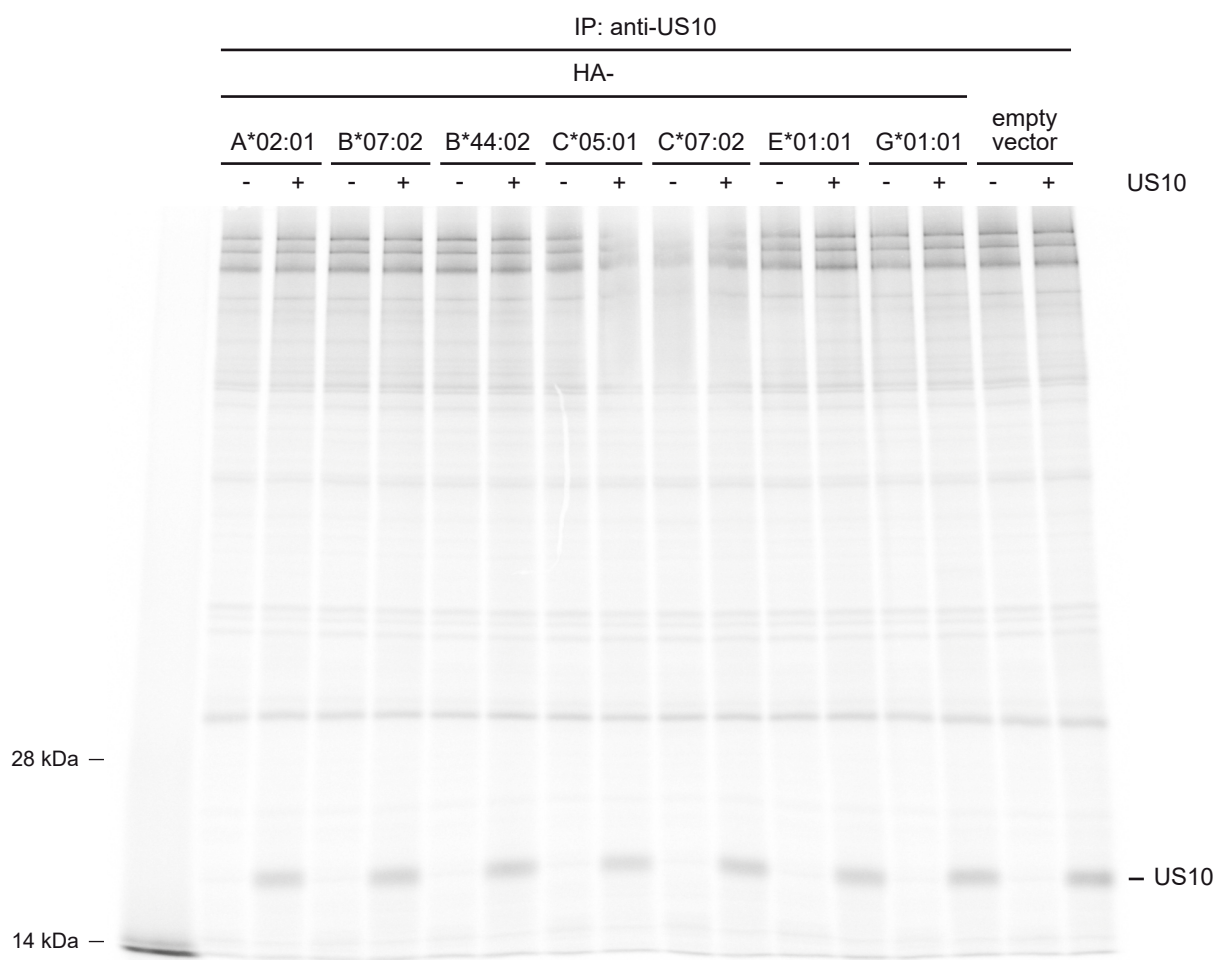

Figure 4A: uncropped gels (2)

Supplement: fig4-data2 [file elife-85560-fig4-data2-v1.zip]

IP: W6/32

~A\*02:01    ~B\*07:02    ~B\*44:02    ~C\*05:01

-    +    -    +    -    +    -    +    US10

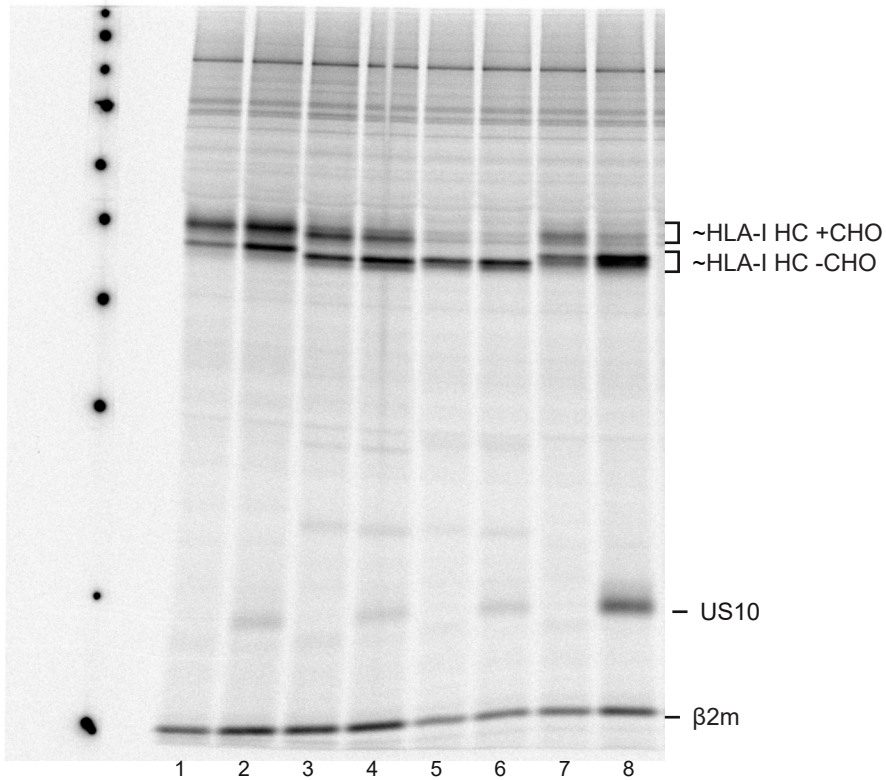

Supplement: fig4-data3 [file elife-85560-fig4-data3-v1.zip]

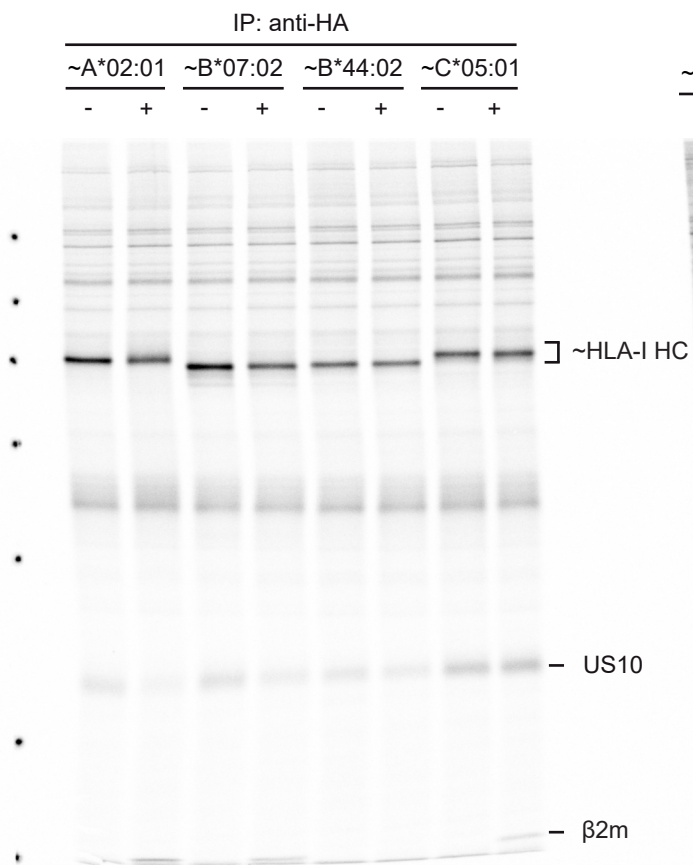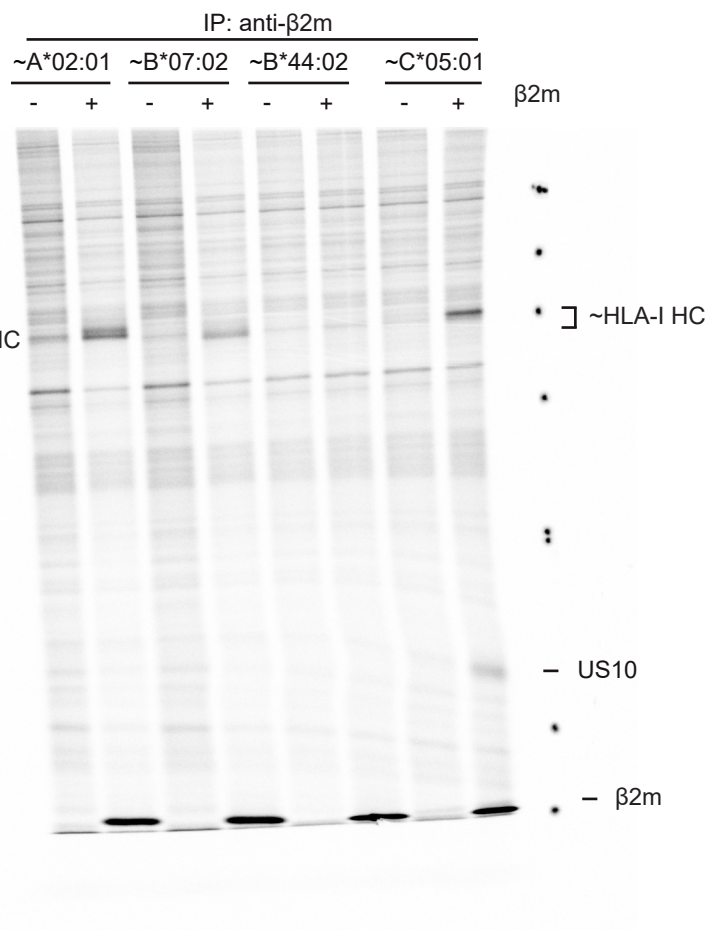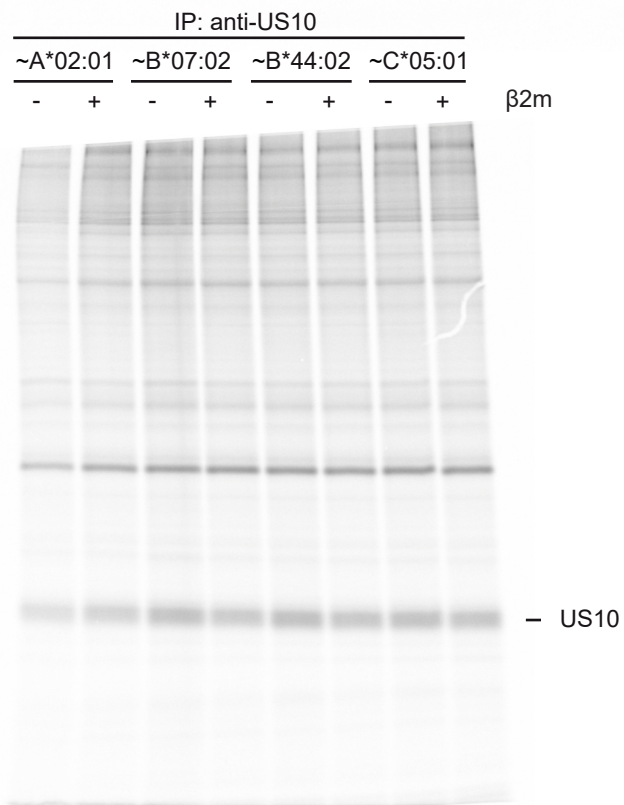

Supplement: fig4-data4 [file elife-85560-fig4-data4-v1.zip]

IP: W6/32

|   |   |   |
|---|---|---|
| - | + | + |
| - | - | + |
| - | + | + |

IP: anti-US10

|   |   |   |
|---|---|---|
| - | + | + |
| - | - | + |
| - | + | + |

US10

BFA

EndoH

- ~A\*02:01 HC +CHO

- ~A\*02:01 HC -CHO

- US10 +CHO

- US10 -CHO

-  $\beta$ 2m

1 2 3

1 2 3

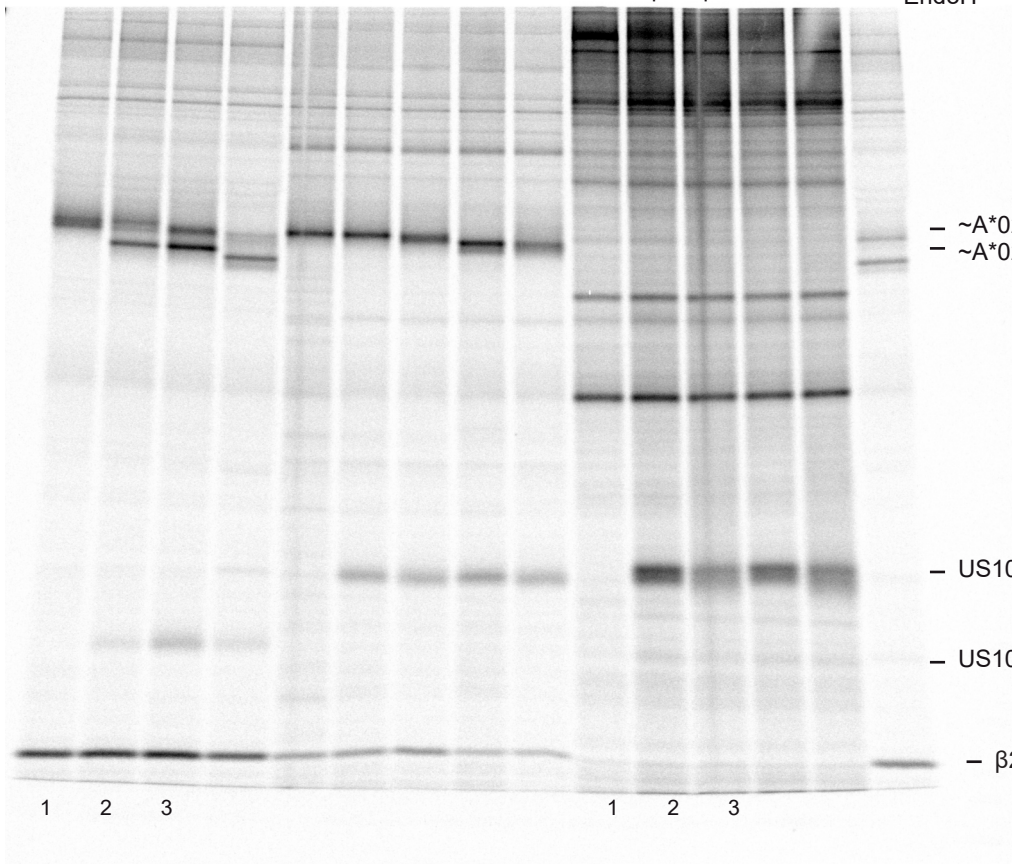

Supplement: fig4-data5 [file elife-85560-fig4-data5-v1.zip]

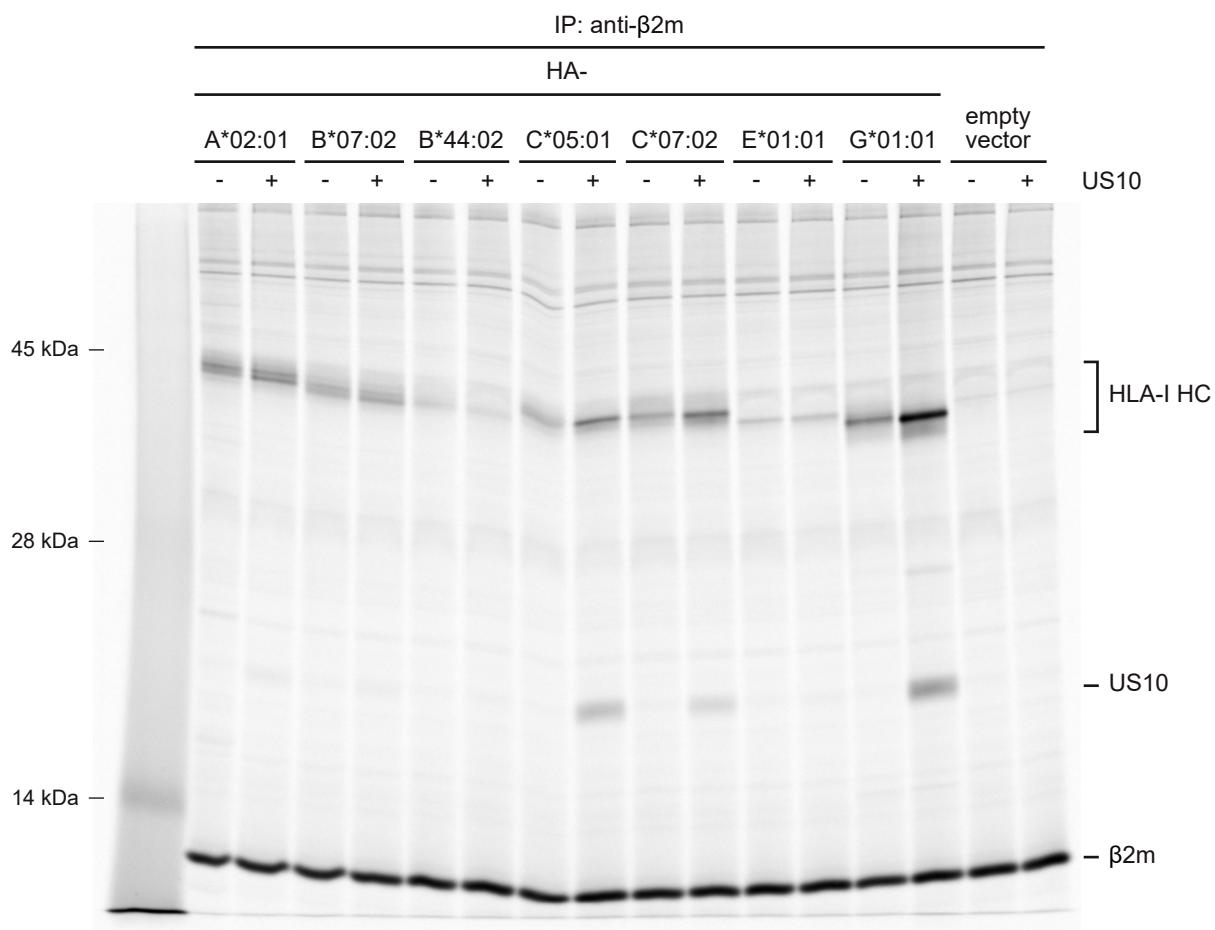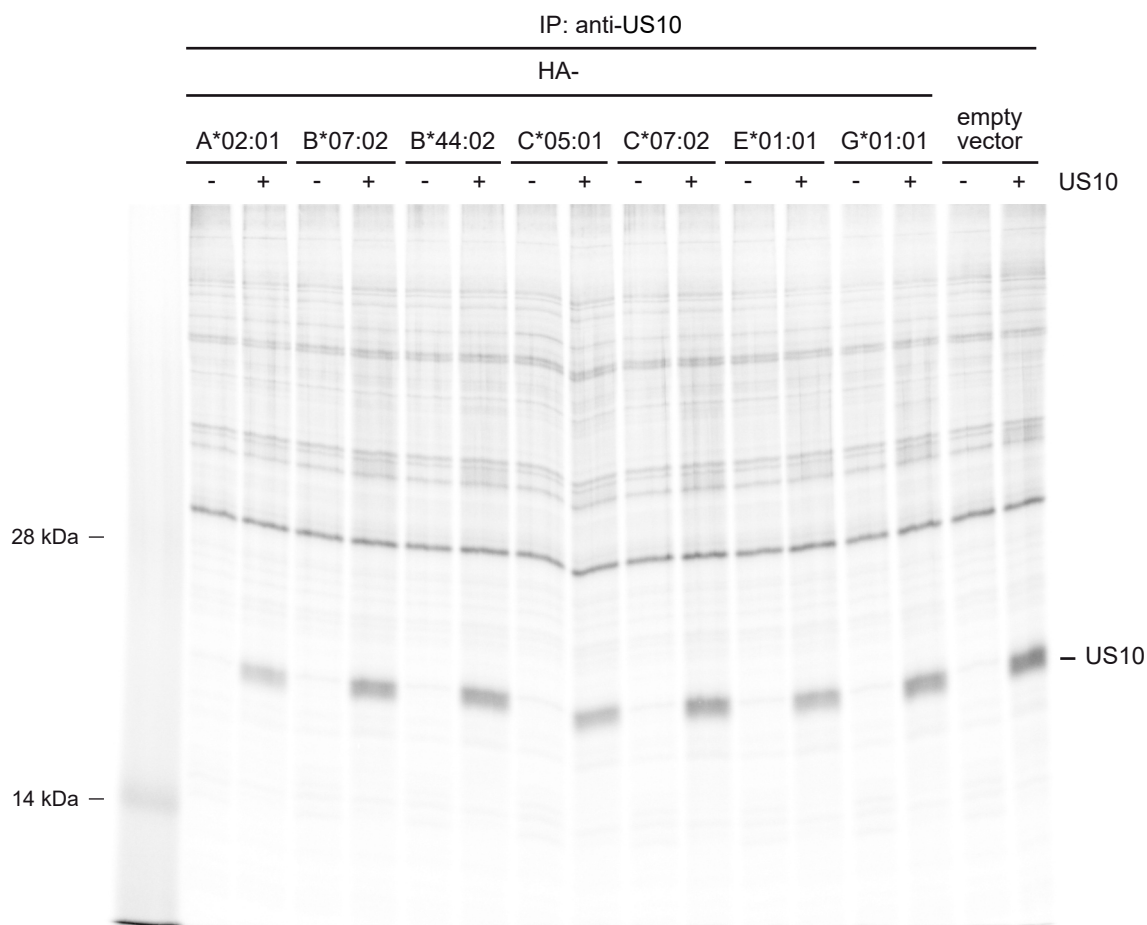

Suppl. Figure 3C: uncropped gels

Supplement: fig4-figsupp1-data1 [file elife-85560-fig4-figsupp1-data1-v1.zip]

IP: W6/32

+

+

+

IP: anti-US10

+

-

+

IP: W6/32

+

+

+

US10

BFA

EndoH

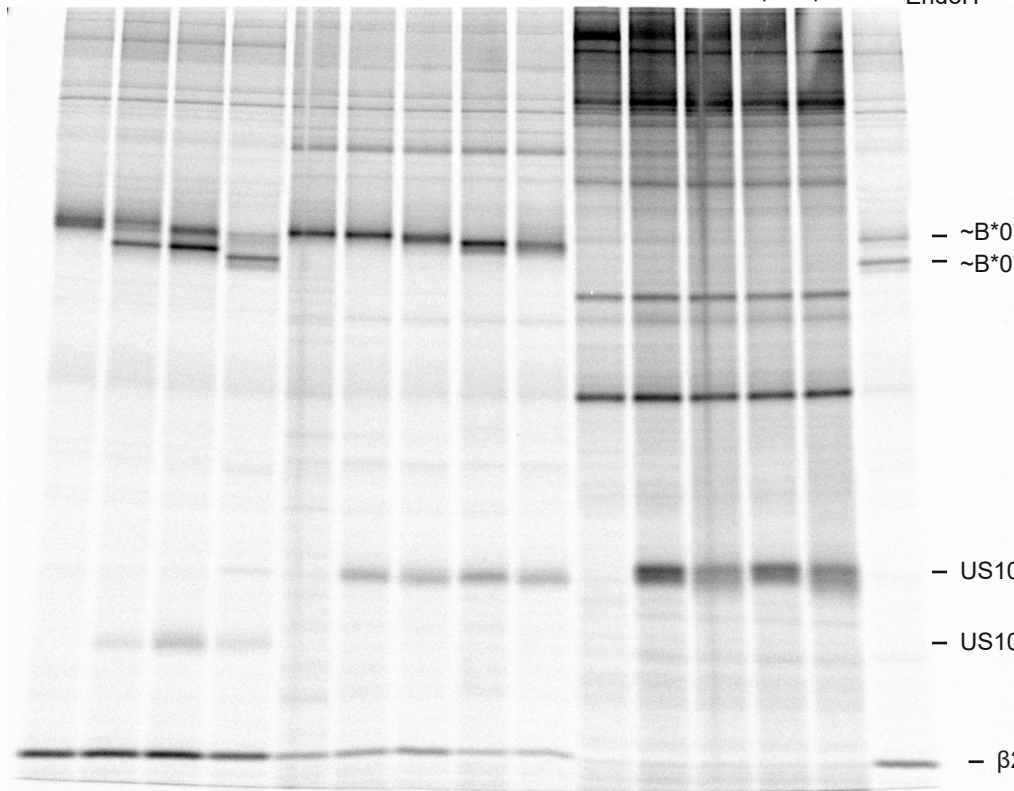

- ~B\*07:02 HC +CHO

- ~B\*07:02 HC -CHO

- US10 +CHO

- US10 -CHO

- β2m

Supplement: fig4-figsupp1-data2 [file elife-85560-fig4-figsupp1-data2-v1.zip]

IP: W6/32

IP: anti-US10

wild-type

cell pool

#3

#4

#5

#10

wild-type

cell pool

#3

#4

#5

#10

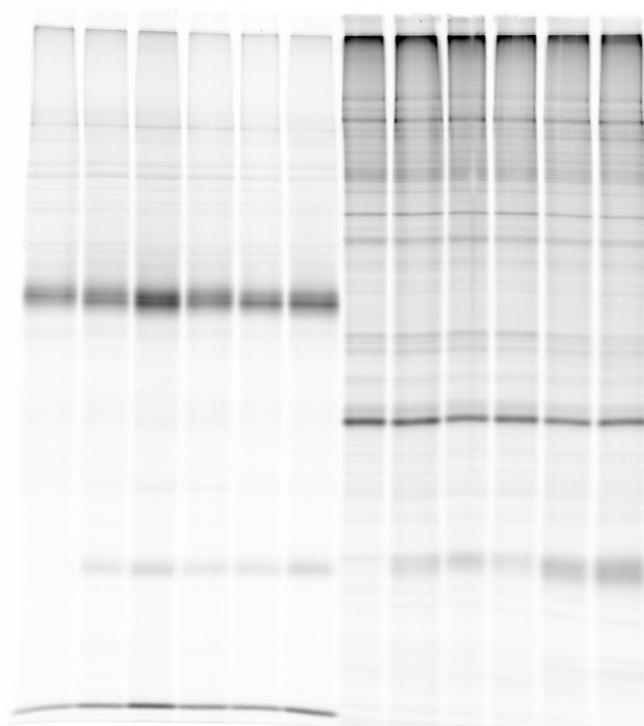

HLA-I HC

US10

β2m

1

2

3

4

5

6

7

8

9

10

11

12

Supplement: fig5-figsupp1-data1 [file elife-85560-fig5-figsupp1-data1-v1.zip]

IP: anti-US10

wild-  
type

#5

+

+

-

dox

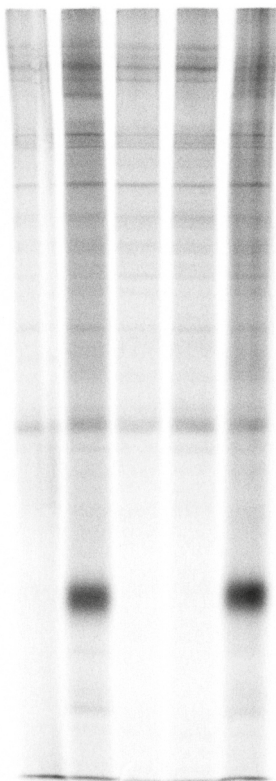

- US10

Supplement: fig5-figsupp1-data2 [file elife-85560-fig5-figsupp1-data2-v1.zip]

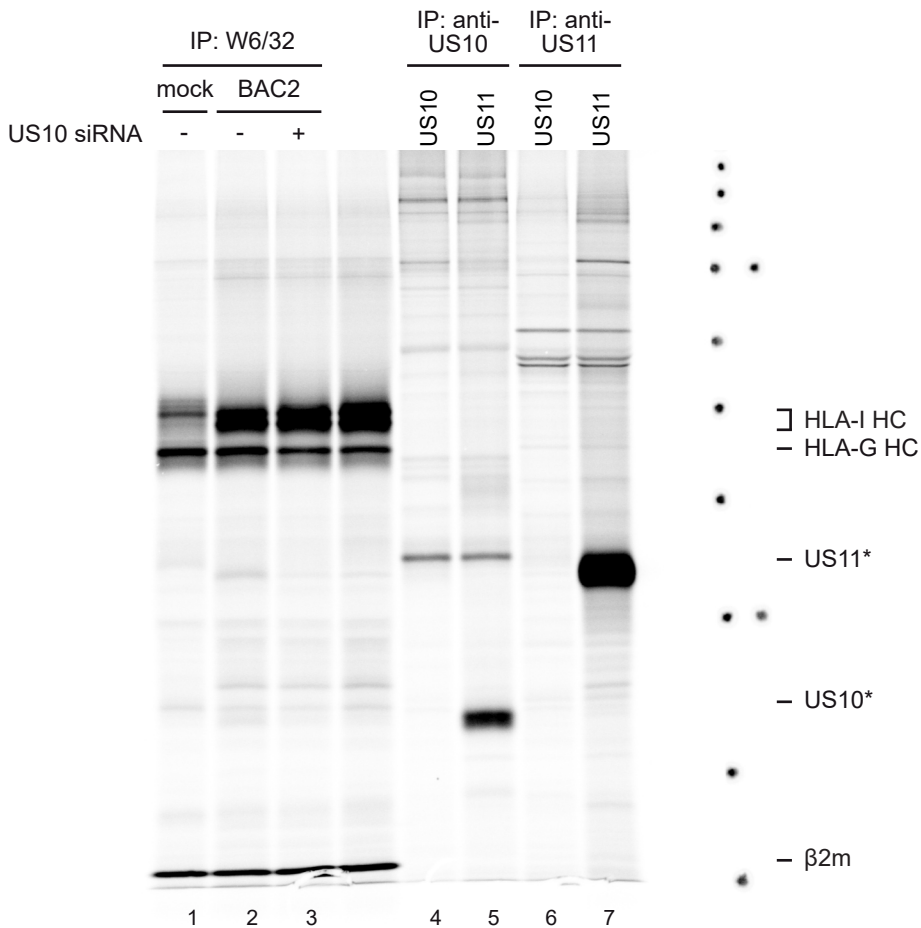

Supplement: fig6-data1 [file elife-85560-fig6-data1-v1.zip]

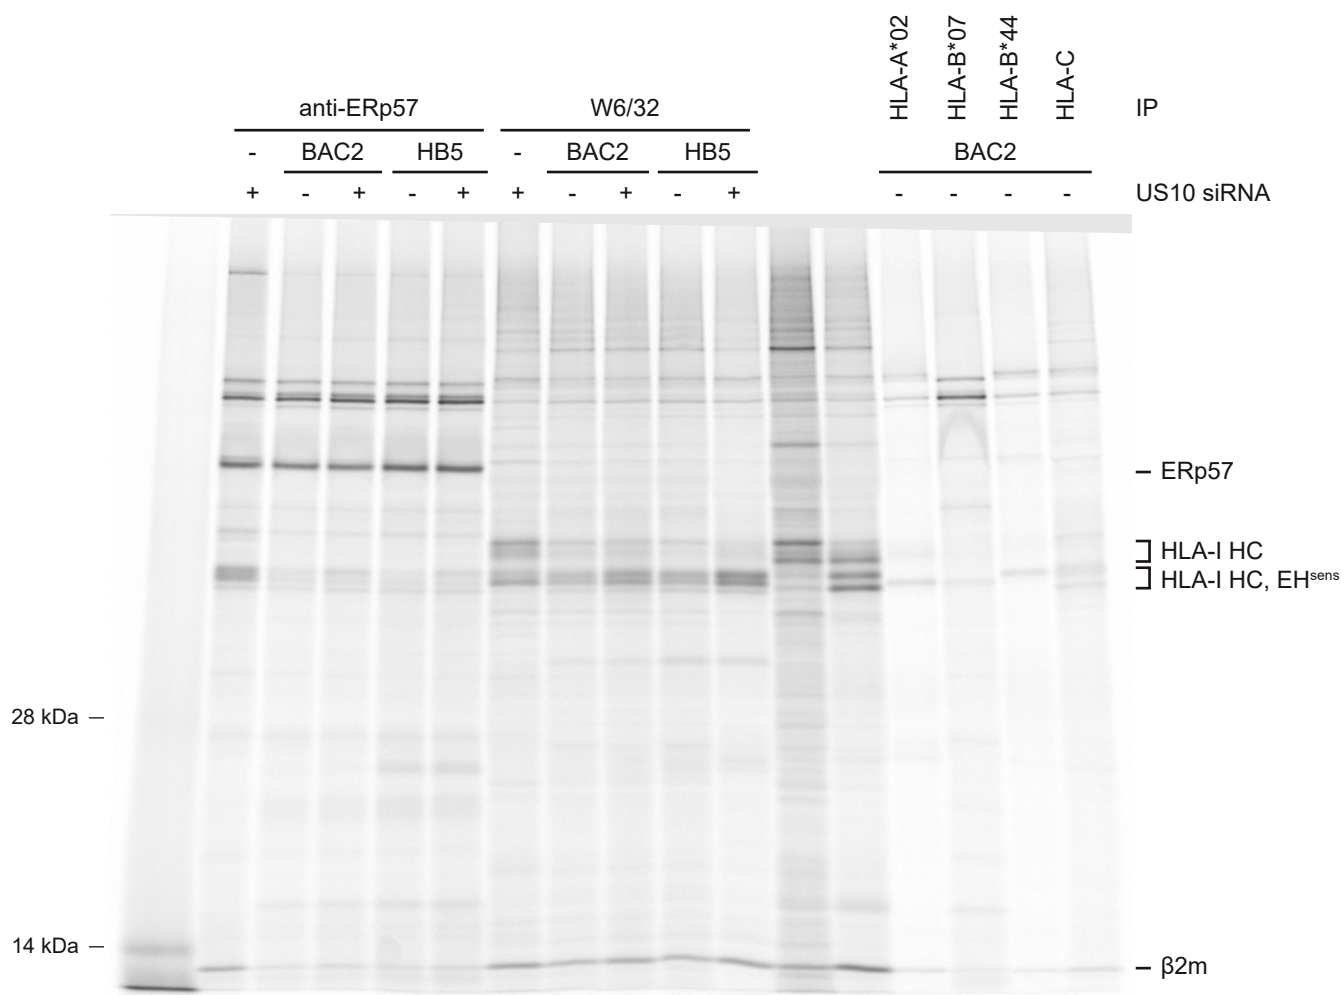

Figure 7CD: uncropped gel

Supplement: fig6-data2 [file elife-85560-fig6-data2-v1.zip]

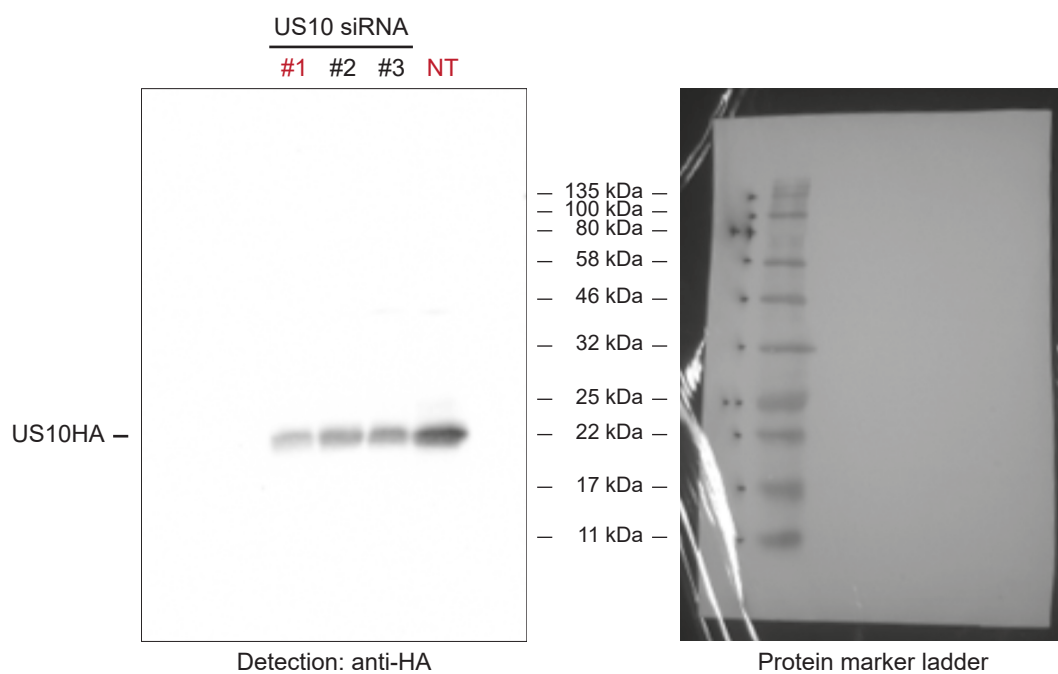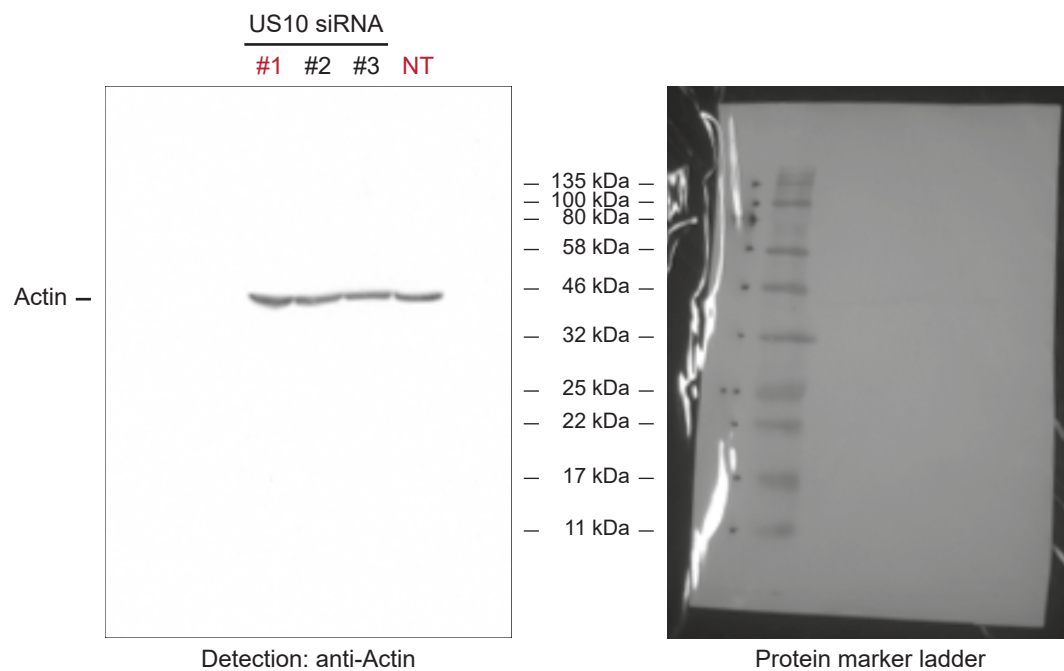

**Suppl. Figure 5C: uncropped blots**

Supplement: fig6-figsupp1-data1 [file elife-85560-fig6-figsupp1-data1-v1.zip]

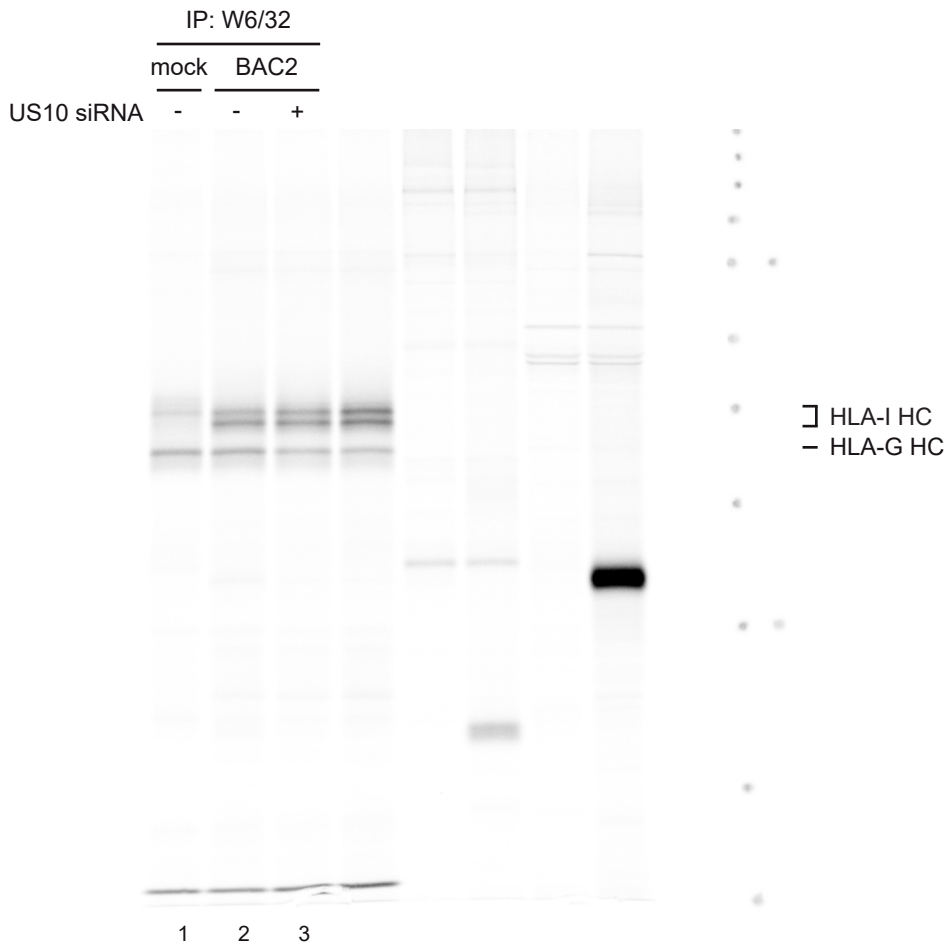

Supplement: fig6-figsupp2-data2 [file elife-85560-fig6-figsupp2-data2-v1.zip]
